# Supplementary material for: Elucidation of the RNA Recognition Code for Pentatricopeptide Repeat Proteins Involved in Organelle RNA Editing in Plants
Source: PubMed Central journal article supplement (PMC3589468; doi:10.1371/journal.pone.0057286), 2013-03-05

**Figure S1**

**A**

|                    | A     | C    | D   | F   | G   | H    | I   | K    | L   | M    | N    | P    | Q    | R   | S   | T    | V    | Total |       |
|--------------------|-------|------|-----|-----|-----|------|-----|------|-----|------|------|------|------|-----|-----|------|------|-------|-------|
| Observed frequency | A     | 4.3  | 4.0 | 0.0 | 0.0 | 8.0  | 0.7 | 1.8  | 0.5 | 2.3  | 0.0  | 10.7 | 1.0  | 0.0 | 1.0 | 15.8 | 26.7 | 9.5   | 86.3  |
|                    | C     | 3.2  | 0.3 | 0.0 | 0.0 | 2.2  | 0.0 | 4.5  | 0.5 | 4.3  | 0.3  | 35.3 | 0.5  | 0.0 | 0.0 | 5.0  | 4.0  | 7.5   | 67.6  |
|                    | G     | 3.0  | 1.3 | 1.0 | 0.0 | 8.0  | 0.0 | 0.8  | 1.0 | 0.0  | 11.3 | 1.7  | 0.0  | 0.0 | 8.8 | 16.2 | 2.8  | 56.0  |       |
|                    | U     | 5.5  | 0.3 | 0.0 | 1.0 | 6.8  | 0.3 | 2.8  | 0.0 | 8.3  | 2.7  | 41.7 | 13.8 | 1.0 | 0.0 | 12.3 | 7.2  | 13.2  | 117.0 |
|                    | Total | 16.0 | 6.0 | 1.0 | 1.0 | 25.0 | 1.0 | 10.0 | 2.0 | 15.0 | 3.0  | 99.0 | 17.0 | 1.0 | 1.0 | 42.0 | 54.0 | 33.0  | 327   |

  

|                    | A     | C    | D   | F   | G   | H    | I   | K    | L   | M    | N   | P    | Q    | R   | S   | T    | V    | Total |       |
|--------------------|-------|------|-----|-----|-----|------|-----|------|-----|------|-----|------|------|-----|-----|------|------|-------|-------|
| Expected frequency | A     | 4.2  | 1.6 | 0.3 | 0.3 | 6.6  | 0.3 | 2.6  | 0.5 | 4.0  | 0.8 | 26.1 | 4.5  | 0.3 | 0.3 | 11.1 | 14.3 | 8.7   | 86.3  |
|                    | C     | 3.3  | 1.2 | 0.2 | 0.2 | 5.2  | 0.2 | 2.1  | 0.4 | 3.1  | 0.6 | 20.5 | 3.5  | 0.2 | 0.2 | 8.7  | 11.2 | 6.8   | 67.6  |
|                    | G     | 2.7  | 1.0 | 0.2 | 0.2 | 4.3  | 0.2 | 1.7  | 0.3 | 2.6  | 0.5 | 16.9 | 2.9  | 0.2 | 0.2 | 7.2  | 9.2  | 5.6   | 56.0  |
|                    | U     | 5.7  | 2.1 | 0.4 | 0.4 | 8.9  | 0.4 | 3.6  | 0.7 | 5.4  | 1.1 | 35.4 | 6.1  | 0.4 | 0.4 | 15.0 | 19.3 | 11.8  | 117.0 |
|                    | Total | 16.0 | 6.0 | 1.0 | 1.0 | 25.0 | 1.0 | 10.0 | 2.0 | 15.0 | 3.0 | 99.0 | 17.0 | 1.0 | 1.0 | 42.0 | 54.0 | 33.0  | 327   |

$P$ -value(Aln4, residue 4) =  $5.7 \times 10^{-7}$

**B**

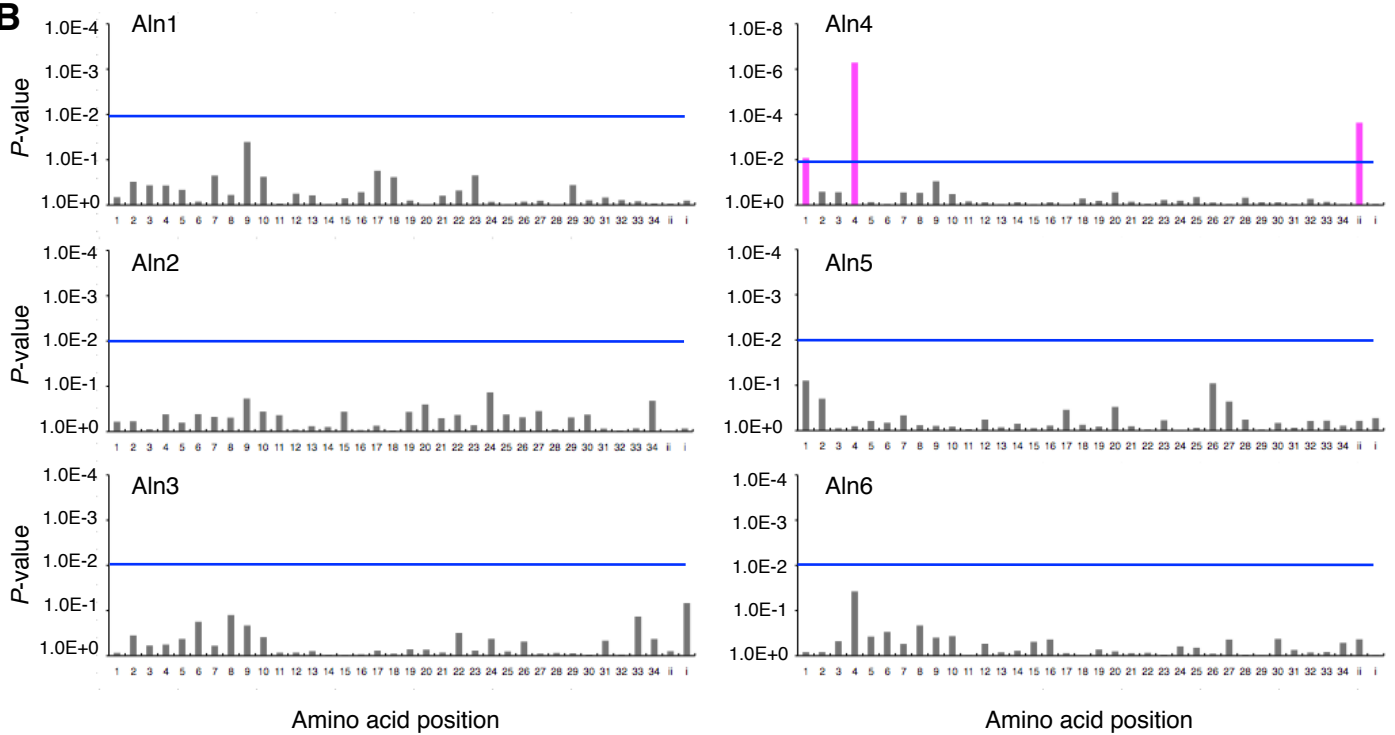

Supplement: pone.0057286.s001.pdf [file pone.0057286.s001.pdf]
