# Supplementary material for: Elucidation of the RNA Recognition Code for Pentatricopeptide Repeat Proteins Involved in Organelle RNA Editing in Plants
Source: PubMed Central journal article supplement (PMC3589468; doi:10.1371/journal.pone.0057286), 2013-03-05

Figure S4

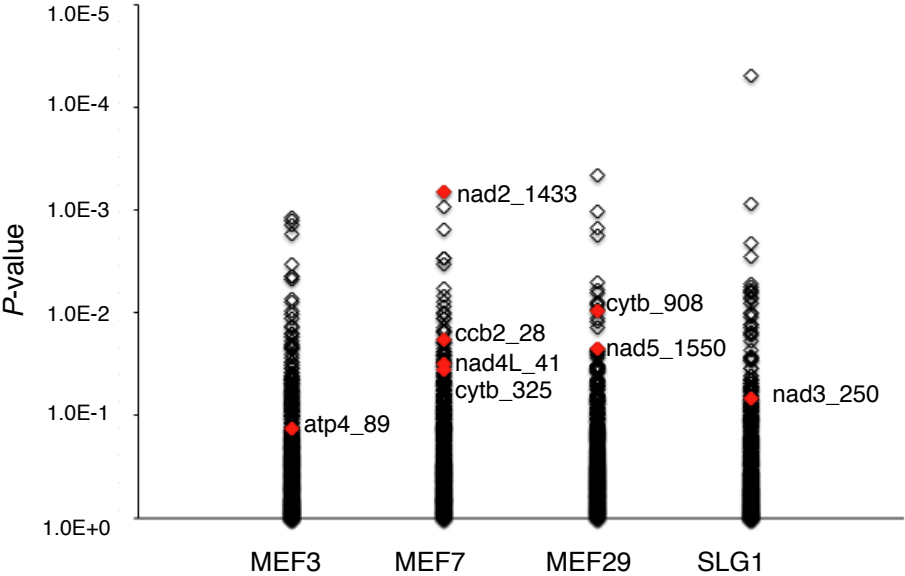

Supplement: pone.0057286.s004.pdf [file pone.0057286.s004.pdf]
