# Supplementary material for: Elucidation of the RNA Recognition Code for Pentatricopeptide Repeat Proteins Involved in Organelle RNA Editing in Plants
Source: PubMed Central journal article supplement (PMC3589468; doi:10.1371/journal.pone.0057286), 2013-03-05
Supplement: pone.0057286.s008.pdf [file pone.0057286.s008.pdf]

**Table S2.** List of PPR proteins and their target sites

| Name     | Species* | AGI number | Localization | NSRs in the motifs                                                                                      | Target RNA sequence                                                                                | Editing site                                  | (ref)   |
|----------|----------|------------|--------------|---------------------------------------------------------------------------------------------------------|----------------------------------------------------------------------------------------------------|-----------------------------------------------|---------|
| PpPPR_56 | Pp       | -          | Mt           | FVN-HNS-ANN-GMD-RTD-ITN-IVD-RTD-VND-ILD-RTN-VND-VVD-SND                                                 | uuuggaagucaccu<br>uauagacgguaucu                                                                   | nad3eU230S<br>nad4eU272S                      | [23,26] |
| PpPPR_71 | Pp       | -          | Mt           | RVN-YNT-VNS-ILD-RTD-SNN-ILD-RTD-VTD-IMD-LTD-VSD-VIH-PND-INN-VVT-KGD                                     | uuccacaggugucuccuu                                                                                 | ccmFCeU122SF                                  | [24]    |
| PpPPR_77 | Pp       | -          | Mt           | AVD-FND-INN-IID-RND-VND-VID-RTD-VNN-TLD-QND-ING-VLN-HND-IND-IAD-NND-MTV-SSD-GND-VNN-FVD-RAN-VND-STT-EGN | caauuacuaucuaagcuauggacau<br>acuuggccuuugaagcagcugcuugg                                            | cox2eU370RW<br>cox3eU733RW                    | [23]    |
| PpPPR_78 | Pp       | -          | Mt           | SMD-YNT-HND-TMD-KNS-VTN-IID-ATD-INN-IVD-GND-ITN-VTD-HND-VND-VID-SNN-IND-VVT-EGN                         | uccugaggucuaauuucuaa<br>acguuaugaaauuuuuuuuaa                                                      | cox1eU755SL<br>rps14eU137SL                   | [25]    |
| PpPPR_79 | Pp       | -          | Mt           | YVN-YNS-VND-FVD-TND-VTS-IMD-RTD-IND-ATD-RND-VTN-IMD-AND-VNN-AVT-KAN                                     | acuuuucgacuauuuuuu                                                                                 | nad5eU598RC                                   | [25]    |
| PpPPR_91 | Pp       | -          | Mt           | SGN-NGD-YND-VSN-ILD-ATN-VTN-VVD-INS-MGN-VMD-STN-VTN-VND-VID-VTD-VNN-ITR-QGD                             | ugcacaauaggauugcau                                                                                 | nad5eU730RW                                   | [23]    |
| MEF3     | At       | At1g06140  | Mt           | VSN-HND-FVD-YPN-VGD-LIS-YAN-VTN-CAD-VTN-ISN-VVE-EAM                                                     | aguucgaagaaga                                                                                      | atp4_89                                       | [47]    |
| MEF7     | At       | At5g09950  | Mt           | YNN-VAN-YVD-VNN-VNT-YGD-FSN-LGS-EVM-GND-VNG-FIN-SNW-SGN-ISE-TND-VND-FAD-VSN-YND-VVR-ESN                 | ccuucuaauuuuucguggucua<br>gagacgacuuuuucugaacua<br>gcaaugacuuuuuuuucuaa<br>uauuucacauuuuucuaugauua | cytb_325<br>ccb206_28<br>nad2_1433<br>nad4L41 | [48]    |
| MEF29    | At       | At4g30700  | Mt           | STD-FNN-SAE-LSD-IND-TLH-YTD-VNR-SVH-STS-PNN-VTS-YTN-VNT-VLS-KAG                                         | uuugcugcuccaacca<br>gguguagccgcaauag                                                               | nad5_1550<br>cytb_908                         | [49]    |
| SLG1     | At       | At5g08490  | Mt           | RLC-EKW-ITS-VAD-LND-VNN-AAH-FNW-VAD-VID-SNW-ADD-VLE-KNT-VND-TSN-VMD-RGD-VTD-VTT-EAN                     | accuuuuucuuuccuugggca                                                                              | nad3_250                                      | [50]    |
| AHG11    | At       | At2g44880  | Mt           | FND-FTD-YTS-VTD-VNT-ITN-VND-VLK-KTQ-AND-ILK-EGN                                                         | This study                                                                                         | This study                                    |         |

\*At, *Arabidopsis thaliana*; Pp, *Physcomitrella patens*.

## References

- Ohtani S, Ichinose M, Tasaki E, Aoki Y, Komura Y, et al. (2010) Targeted gene disruption identifies three PPR-DYW proteins involved in RNA editing for five editing sites of the moss mitochondrial transcripts. *Plant Cell Physiol* 51: 1942-1949.
- Tasaki E, Hattori M, Sugita M (2010) The moss pentatricopeptide repeat protein with a DYW domain is responsible for RNA editing of mitochondrial *ccmFc* transcript. *Plant J* 62: 560-570.
- Uchida M, Ohtani S, Ichinose M, Sugita C, Sugita M (2011) The PPR-DYW proteins are required for RNA editing of *rps14*, *cox1* and *nad5* transcripts in *Physcomitrella patens* mitochondria. *FEBS Lett* 585: 2367-2371.
- Rudinger M, Szovenyi P, Rensing SA, Knoop V (2011) Assigning DYW-type PPR proteins to RNA editing sites in the funariid mosses *Physcomitrella patens* and *Funaria hygrometrica*. *Plant J* 67: 370-380.
- Verbitskiy D, Merwe JA, Zehrmann A, Hartel B, Takenaka M (2012) The E-class PPR protein MEF3 of *Arabidopsis thaliana* can also function in mitochondrial RNA editing with an additional DYW domain. *Plant Cell Physiol* 53: 358-367.
- Zehrmann A, van der Merwe J, Verbitskiy D, Hartel B, Brennicke A, et al. (2012) The DYW-class PPR protein MEF7 is required for RNA editing at four sites in mitochondria of *Arabidopsis thaliana*. *RNA Biol* 9: 155-161.
- Sosso D, Mbello S, Vernoud V, Gendrot G, Dedieu A, et al. (2012) PPR2263, a DYW-Subgroup Pentatricopeptide repeat protein, is required for mitochondrial *nad5* and *cob* transcript editing, mitochondrion biogenesis, and maize growth. *Plant Cell* 24: 676-691.
- Yuan H, Liu D (2012) Functional disruption of the pentatricopeptide protein SLG1 affects mitochondrial RNA editing, plant development, and responses to abiotic stresses in *Arabidopsis*. *Plant J* 70: 432-444.
