# Supplementary material for: Elucidation of the RNA Recognition Code for Pentatricopeptide Repeat Proteins Involved in Organelle RNA Editing in Plants
Source: PLoS One. 2013 Mar 5;8(3):e57286. doi: 10.1371/journal.pone.0057286 (PMC3589468; doi:10.1371/journal.pone.0057286)
Supplement: Table S1 — List of PPR proteins and their target sites. (PDF) [file pone.0057286.s007.pdf]

**Table S1.** List of PPR proteins and their target sites

| Name  | Species* | AGI number | Localization | NSRs in the motifs                                                                         | Target RNA sequence                                        | Editing site                                   | (ref) |
|-------|----------|------------|--------------|--------------------------------------------------------------------------------------------|------------------------------------------------------------|------------------------------------------------|-------|
| CLB19 | At       | At1g05750  | Chl          | VTN-IIH-MTN-VNW-AND-VIN-RNT-VND-VTR-EGI                                                    | acacgugcaa<br>agaagcccaa                                   | rpoA(78691)<br>clpP(69942)                     | [35]  |
| CRR21 | At       | At5g55740  | Chl          | EGN-YTN-FAD-FPC-FSN-VNT-VSD-ITD-VND-VAD-VSD-INN-<br>INN-ITN-FTL-STE-PND-ITC-EGD            | auguacagcggucaaaauag                                       | ndhD(116785)                                   | [16]  |
| CRR22 | At       | At1g11290  | Chl          | FTL-VHV-YTD-FTD-VNS-IVL-NTN-VNT-VMN-SNT-VND-FVN-<br>FTH-TNN-VLS-DGA                        | aagcuuuccuagccc<br>uauagcagcuucaacu<br>auauauuucuguuuc     | ndhB(96419)<br>ndhD(116281)<br>rpoB(25779)     | [36]  |
| CRR28 | At       | At1g59720  | Chl          | FGS-FND-HPD-YNS-VND-YQD-LND-ANN-VVA-EGD                                                    | aucuuuguag<br>auuuuagcag                                   | ndhB(96698)<br>ndhD(116290)                    | [36]  |
| CRR4  | At       | At2g45350  | Chl          | FND-FSD-FND-VNN-IND-INW-TDD-VND-TVG-KVS-DND-IVR-<br>QGN                                    | uauucuugucuuaa                                             | ndhD(117166)                                   | [37]  |
| LOI1  | At       | At4g14850  | Mt           | DGP-FNN-VTN-FPD-FCN-ENN-ICD-SNW-SAS-FST-FSN-VNN-<br>MVG-EST                                | ugauacgauuaauu<br>uaauacccuuauuc<br>uaauauugugacuu         | nad4(161816)<br>cox3(218701)<br>ccb203(257133) | [38]  |
| LPA66 | At       | At5g48910  | Chl          | LAN-FNN-FPD-FSE-VNS-VNN-VVD-VSN-ISS-VIR-EGD                                                | uguaccuaccg                                                | psbF(63985)                                    | [39]  |
| MEF1  | At       | At5g52630  | Mt           | NCI-LNS-TSD-HPD-FSN-VSN-YSS-FSN-GNN-ILT-KAW                                                | accuacucauu<br>acagaagguuu<br>aacgaauccua                  | rps4(82161)<br>nad7(137931)<br>nad2(329886)    | [40]  |
| MEF9  | At       | At1g62260  | Mt           | VNW-TSD-FNW-ATA-VLL-YNN-VND-INW-MSH-VND-HTD-<br>PNE-INS-IVQ-ESD                            | uucaagcuuuaccuu                                            | nad7(133233)                                   | [41]  |
| MEF14 | At       | At3g26780  | Mt           | FNT-SPD-FSI-SSD-MVG-SND-VNN-ISD-ITN-RTN-IVG-EGG                                            | aguacuccaaagcu                                             | matR(144418)                                   | [42]  |
| MEF18 | At       | At5g19020  | Mt           | RVN-YND-ANS-VTN-VAR-FTN-VND-VGS-VVY-FAH-AND-FND-<br>IVN-NAT-SNN-IVD-KGD                    | uccauaaaauucuccg                                           | nad4(167599)                                   | [43]  |
| MEF19 | At       | At3g05240  | Mt           | ISS-YND-FPN-YTN-VGN-TVN-ITT-VND-VLD-ACD-ITD-ILT-<br>EGN                                    | uuauugauugguu                                              | ccb206(239125)                                 | [43]  |
| MEF20 | At       | At3g18970  | Mt           | RVS-LTW-AGT-TVD-FTN-FTN-ITV-EGD                                                            | cacgaaag                                                   | rps4(82891)                                    | [43]  |
| MEF21 | At       | At2g20540  | Mt           | FTN-FND-FPH-VND-INW-ASD-IIQ-GND-ISN-ILK-EGD                                                | acuucgauaug                                                | cox3(218536)                                   | [43]  |
| MEF22 | At       | At3g12770  | Mt           | FTQ-FND-FPD-FNT-VTD-VVE-DIN-IND-ITD-FSD-VSN-VLQ-<br>QAG                                    | ugugguuucgauc                                              | nad3(260858)                                   | [43]  |
| otp80 | At       | At5g59200  | Chl          | FFN-YTN-VSS-SLD-VTD-VTN-FVS-FND-INN-VVQ-EGD                                                | ugucgaaucag                                                | rpl23(86055)                                   | [28]  |
| otp81 | At       | At2g29760  | Chl          | FNN-YPD-FND-VNS-VVN-TND-VTW-ASN-IVN-HSD-FSN-VTE-<br>KAS                                    | auucuuuuugaaa                                              | rps12(69553)                                   | [28]  |
| otp82 | At       | At1g08070  | Chl          | LNN-YPD-PTY-AKD-VND-SVN-KND-INN-VLA-STS-SND-IVK-<br>EGD                                    | uuaguuuuucugg<br>guagcugcuucag                             | ndhG(118858)<br>ndhB(95644)                    | [28]  |
| otp84 | At       | At3g57430  | Chl          | EID-YPS-TNN-VNS-FVN-FND-VND-FSN-FSW-AAN-TAD-FNW-<br>TTN-IMD-ASN-INN-VIS-DAN                | auccacuuacuucuuua<br>uugcauuauuuuuacuu<br>gugugauagcauacua | ndhF(112349)<br>psbZ(35800)<br>ndhB(94999)     | [28]  |
| otp85 | At       | At2g02980  | Chl          | VND-YND-YPN-VNN-ILY-KTD-QSD-ILS-KGL                                                        | uugccguca                                                  | ndhD(116494)                                   | [28]  |
| otp86 | At       | At3g63370  | Chl          | FGT-FNG-SPT-FND-VNN-VVE-YND-VND-VTN-QND-ITD-<br>MGD-VND-VTD-VLE-SVG-LTD-ILW-EVT            | uaucauuugauucgucgau                                        | rps14(37161)                                   | [28]  |
| otp87 | At       | At1g74600  | Mt           | FKD-VNN-IGY-VSN-YND-YSD-FTS-VTN-CTD-SAR-NND-FC-<br>TSD-AAD-SAG-DSD-VSD-FSE-SSD-ITD-VVE-RVW | ccaugacgacuaggaaggca<br>gcuauagaacaaguaucggua              | nad7(132094)<br>atp1(82180)                    | [44]  |
| SLO1  | At       | At2g22410  | Mt           | FND-FPV-HND-VND-VIT-PNT-VTW-AGD-IIN-ATN-LTD-IIQ-KSD                                        | uuucccgaaagcg<br>auuuccaucagcc                             | nad4(162141)<br>nad9(23908)                    | [45]  |
| YS1   | At       | At3g22690  | Chl          | FND-YPD-FNW-SCN-VVN-LSN-DND-ILW-NNT-VNW-TSD-<br>VMD-RTD-STD-VVE-VGN                        | augaaauuccuuggaa                                           | rpoB(25779)                                    | [46]  |

\*At, Arabidopsis thaliana

**References**

16. Okuda K, Myouga F, Motohashi R, Shinozaki K, Shikanai T (2007) Conserved domain structure of pentatricopeptide repeat proteins involved in chloroplast RNA editing. *Proc Natl Acad Sci USA* 104: 8178-8183.
28. Hammani K, Okuda K, Tanz SK, Chateigner-Boutin AL, Shikanai T, et al. (2009) A study of new Arabidopsis chloroplast RNA editing mutants reveals general features of editing factors and their target sites. *Plant Cell* 21: 3686-3699.
35. Chateigner-Boutin A-L, Ramos-Vega M, Guevara-García A, Andrés C, de la Luz Gutiérrez-Nava Ma, et al. (2008) CLB19, a pentatricopeptide repeat protein required for editing of rpoA and clpP chloroplast transcripts. *Plant J* 56: 590-602.
36. Okuda K, Chateigner-Boutin AL, Nakamura T, Delannoy E, Sugita M, et al. (2009) Pentatricopeptide repeat proteins with the DYW motif have distinct molecular functions in RNA editing and RNA cleavage in Arabidopsis chloroplasts. *Plant Cell* 21: 146-156.
37. Kotera E, Tasaka M, Shikanai T (2005) A pentatricopeptide repeat protein is essential for RNA editing in chloroplasts. *Nature* 433: 326-330.
38. Tang J, Kobayashi K, Suzuki M, Matsumoto S, Muranaka T (2010) The mitochondrial PPR protein LOVASTATIN INSENSITIVE 1 plays regulatory roles in cytosolic and plastidial isoprenoid biosynthesis through RNA editing. *Plant J* 61: 456-466.
39. Cai W, Ji D, Peng L, Guo J, Ma J, et al. (2009) LPA66 is required for editing psbF chloroplast transcripts in Arabidopsis. *Plant Physiol* 150: 1260-1271.
40. Zehrmann A, Verbitskiy D, van der Merwe JA, Brennicke A, Takenaka M (2009) A DYW domain-containing pentatricopeptide repeat protein is required for RNA editing at multiple sites in mitochondria of Arabidopsis thaliana. *Plant Cell* 21: 558-567.
41. Takenaka M (2009) MEF9, an E-subclass pentatricopeptide repeat protein, is required for an RNA editing event in the nad7 transcript in mitochondria of Arabidopsis. *Plant Physiol* 152: 939-947.
42. Verbitskiy D, Härtel B, Zehrmann A, Brennicke A, Takenaka M (2011) The DYW-E-PPR protein MEF14 is required for RNA editing at site matR-1895 in mitochondria of Arabidopsis thaliana. *FEBS Lett* 585: 700-704.
43. Takenaka M, Verbitskiy D, Zehrmann A, Brennicke A (2010) Reverse genetic screening identifies five E-class PPR proteins involved in RNA editing in mitochondria of Arabidopsis thaliana. *J Biol Chem* 285: 27122-27129.
44. Hammani K, Colas des Francs-Small C, Takenaka M, Tanz SK, Okuda K, et al. (2011) The pentatricopeptide repeat protein OTP87 is essential for RNA editing of nad7 and atp1 transcripts in Arabidopsis mitochondria. *J Biol Chem* 286: 21361-21371.
45. Sung T-Y, Tseng C-C, Hsieh M-H (2010) The SLO1 PPR protein is required for RNA editing at multiple sites with similar upstream sequences in Arabidopsis mitochondria. *Plant J* 63: 499-511.
46. Zhou W, Cheng Y, Yap A, Chateigner-Boutin A-L, Delannoy E, et al. (2009) The Arabidopsis gene YS1 encoding a DYW protein is required for editing of rpoB transcripts and the rapid development of chloroplasts during early growth. *Plant J* 58: 82-96.
