# Supplementary material for: Elucidation of the RNA Recognition Code for Pentatricopeptide Repeat Proteins Involved in Organelle RNA Editing in Plants
Source: PLoS One. 2013 Mar 5;8(3):e57286. doi: 10.1371/journal.pone.0057286 (PMC3589468; doi:10.1371/journal.pone.0057286)
Supplement: Table S3 — List of scoring matrix for NSRs extracted from 327 PPR motifs in 24 Arabidopsis PPR proteins. (XLS) [file pone.0057286.s009.xls]

## Sheet: Sheet1
Table S3. List of scoring matrix for NSRs extracted from 327 PPR motifs in 24 Arabidopsis PPR proteins
NSRs (1, 4, ii)	occurrence of the NSR(s)	Nucleotide occurrence frequency				1 Probabilitiy matrix
		A	C	G	U	A	C	G	U
VND	16	0.5	5.333	0	10.166	0.0779552	0.308148	0.0343448	0.580065
FND	12	1.833	2.333	1	6.833	0.177845	0.197345	0.103134	0.522242
EGD	8	0	0	7	1	0.0691605	0.0541974	0.691302	0.186076
VNN	7	1.33	5.33	0	0.33	0.21051	0.609488	0.0471025	0.132635
FSN	6	4.666	0.666	0.333	0.333	0.628981	0.138972	0.0891931	0.143433
VTN	6	3.5	1	1.5	0	0.490984	0.178501	0.227308	0.104023
ITD	5	0	1	3	1	0.0818203	0.202315	0.467655	0.24908
INN	5	0	3.166	0	1.833	0.0818203	0.501649	0.0530656	0.364197
YND	4	0	0.5	0.5	3	0.0882587	0.152497	0.140575	0.619608
TSD	4	0.333	0.666	0.5	2.5	0.143759	0.180164	0.140575	0.536275
VSN	4	2.666	0.333	0	1	0.532592	0.124664	0.0572413	0.286275
FTN	4	4	0	0	0	0.754925	0.0691636	0.0572413	0.119608
VNS	4	0	3.332	0	0.666	0.0882587	0.624497	0.0572413	0.230608
FPD	3	0	0	0	3	0.0969148	0.0759469	0.0628553	0.765314
YPD	3	0	0	0	3	0.0969148	0.0759469	0.0628553	0.765314
VSD	3	1.5	0	1	0.5	0.413902	0.0759469	0.27418	0.237002
VTD	3	0	0	3	0	0.0969148	0.0759469	0.69683	0.131339
VVE	3	1	0.5	0	1.5	0.30824	0.181609	0.0628553	0.448326
EGN	3	2	0	0	1	0.519565	0.0759469	0.0628553	0.342664
FNN	3	1.666	0	1.33	0	0.448982	0.0759469	0.343917	0.131339
YTN	3	0	0	1	2	0.0969148	0.0759469	0.27418	0.553989
FNW	3	0.333	1	1	0.666	0.167286	0.287272	0.27418	0.272081
INW	3	0	1	0	2	0.0969148	0.287272	0.0628553	0.553989
VNW	3	0.5	1.5	0	1	0.202577	0.392934	0.0628553	0.342664
*ND	48	3.833	8.666	5	30.499	0.103179	0.183941	0.112688	0.600511
*NN	23	3.329	11.994	3.496	4.159	0.16545	0.467304	0.155403	0.211538
*TN	20	12.833	1.666	2.833	2.666	0.572779	0.105995	0.147146	0.174513
*SD	18	3.833	2.666	6.5	5	0.222831	0.159437	0.324987	0.293237
*TD	17	2.333	1.333	11.666	1.666	0.162131	0.103607	0.585806	0.148912
*SN	14	9.332	0.999	0.333	3.333	0.581834	0.100067	0.0549854	0.263538
*GD	11	0.5	0	8	2.5	0.0962631	0.0480678	0.598573	0.257748
*NW	10	1.163	3.83	1.33	3.666	0.151972	0.340833	0.142304	0.364732
*PD	9	0	0.5	0.666	7.833	0.066194	0.0935394	0.098431	0.742456
*VN	9	2.666	2	1.333	3	0.288361	0.218539	0.154014	0.339706
*NS	8	0.333	4.998	0	2.666	0.0999129	0.51576	0.044855	0.33993
*NT	8	1	4.832	1.5	0.666	0.16151	0.50043	0.183379	0.155231
*GN	6	4	0	0	2	0.550159	0.0601512	0.0497824	0.340723
*VG	5	1	3	0	1	0.220017	0.478708	0.0530656	0.24908
*AD	4	0.333	0	3	0.666	0.143759	0.0691636	0.557241	0.230608
*VD	4	1	1	1	1	0.254925	0.23583	0.223908	0.286275
*VE	4	1	0.5	0	2.5	0.254925	0.152497	0.0572413	0.536275
*CD	3	1	0.33	1.33	0.33	0.30824	0.145684	0.343917	0.201076
*AN	3	0.666	0.666	0	1.666	0.237657	0.216689	0.0628553	0.483406
*IN	3	0.5	1	0	1.5	0.202577	0.287272	0.0628553	0.448326
*LS	3	0.333	1.333	0	1.333	0.167286	0.357643	0.0628553	0.413035
*SS	3	0	1	0.333	1.666	0.0969148	0.287272	0.133226	0.483406
*VS	3	1	1	0	1	0.30824	0.287272	0.0628553	0.342664
*GT	3	1	1	0	1	0.30824	0.287272	0.0628553	0.342664
*TW	3	1.5	0	0.5	1	0.413902	0.0759469	0.168518	0.342664
*N*	99	10.658	35.32	11.326	41.656	0.122006	0.343135	0.119639	0.415111
*T*	54	26.665	3.999	16.165	7.165	0.466364	0.0900388	0.284064	0.159773
*S*	42	15.831	4.995	8.829	12.331	0.361936	0.130767	0.205069	0.302315
*V*	33	9.499	7.5	2.833	13.166	0.284428	0.22434	0.098581	0.393018
*G*	25	8	2.166	8	6.833	0.310796	0.106782	0.295287	0.287571
*P*	17	1	0.5	1.666	13.833	0.0990243	0.0641717	0.11239	0.724916
*A*	16	4.332	3.166	3	5.498	0.269555	0.199798	0.184345	0.346665
*L*	15	2.333	4.333	0	8.333	0.177951	0.272167	0.03524	0.515166
*I*	10	1.833	4.5	0.833	2.833	0.202875	0.391736	0.104544	0.301445
*C*	6	4	0.33	1.33	0.33	0.550159	0.0992068	0.207188	0.143078
*M*	3	0	0.333	0	2.666	0.0969148	0.146318	0.0628553	0.694731
Background frequency		0.264776	0.207491	0.171724	0.358825	0.264776	0.207491	0.171724	0.358825
1 The probability matrix is obtained from the nucleotide occurrence frequency with correction based on pseudo counts (see Material and Methods).
