# Supplementary material for: Elucidation of the RNA Recognition Code for Pentatricopeptide Repeat Proteins Involved in Organelle RNA Editing in Plants
Source: PLoS One. 2013 Mar 5;8(3):e57286. doi: 10.1371/journal.pone.0057286 (PMC3589468; doi:10.1371/journal.pone.0057286)
Supplement: Table S4 — List of scoring matrix for NSRs extracted from 464 PPR motifs in 27 Arabidopsis and 5 Physcomitrella PPR proteins. (XLS) [file pone.0057286.s010.xls]

## Sheet: Sheet1
Table S4. List of scoring matrix for NSRs extracted from 464 PPR motifs in 27 Arabidopsis and 5 Physcomitrella PPR proteins1
NSRs (1, 4, ii)	occurrence of the NSR(s)	Nucleotide occurrence frequency				2 Probabilitiy matrix
		A	C	G	U	A	C	G	U
VND	23	0.5	5.833	1	15.666	0.062728	0.245323	0.0646023	0.62728
FND	13	2.833	2.333	1	6.833	0.226908	0.185134	0.0962446	0.491615
VNN	10	1.83	6.33	0	1.83	0.201332	0.530313	0.0398603	0.227693
VTN	10	7.5	1	1.5	0	0.632109	0.125367	0.153822	0.0886591
EGD	8	0	0	7	1	0.0677312	0.0536999	0.689783	0.18874
VTD	7	0	0	6	1	0.0711249	0.0563906	0.667543	0.204893
INN	7	0.5	4.166	0	2.333	0.122961	0.488291	0.0455076	0.343088
FSN	7	5.416	0.666	0.333	0.583	0.632616	0.125437	0.0800306	0.161661
YND	6	0	2	0.5	3.5	0.0751717	0.2963	0.107272	0.521205
RTD	6	1	0	5	0	0.193522	0.059599	0.639849	0.106979
VSN	6	4.416	0.333	0	1.25	0.597807	0.0990097	0.0480968	0.254917
IND	5	1	0.5	0	3.5	0.218326	0.132628	0.0512688	0.597723
ITD	5	0	1	3	1	0.0801293	0.201726	0.465859	0.252231
EGN	5	4	0	0	1	0.632916	0.0635296	0.0512688	0.252231
ITN	5	5	0	0	0	0.771112	0.0635296	0.0512688	0.114035
VNS	5	0	4.332	0	0.666	0.0801293	0.662197	0.0512688	0.206074
VNT	5	0	3.666	0	1.333	0.0801293	0.570158	0.0512688	0.298251
ILD	4	1	2.5	0	0.5	0.253101	0.485195	0.0553032	0.206341
IMD	4	0	1	0	3	0.0864346	0.235195	0.0553032	0.623008
AND	4	0	0	1	3	0.0864346	0.0685287	0.22197	0.623008
TSD	4	0.333	0.666	0.5	2.5	0.141935	0.179529	0.138636	0.539675
VSD	4	1.5	1	1	0.5	0.336435	0.235195	0.22197	0.206341
FNN	4	1.666	0	1.83	0.5	0.364101	0.0685287	0.360303	0.206341
FTN	4	4	0	0	0	0.753101	0.0685287	0.0553032	0.123008
YTN	4	1	0	1	2	0.253101	0.0685287	0.22197	0.456341
GND	3	0	0	0	3	0.0949118	0.0752498	0.0607271	0.769047
HND	3	0.5	0.5	0.5	1.5	0.200574	0.180912	0.16639	0.452059
SND	3	0	0.5	1	1.5	0.0949118	0.180912	0.272052	0.452059
TND	3	0.25	0	0	2.75	0.147743	0.0752498	0.0607271	0.716215
FPD	3	0	0	0	3	0.0949118	0.0752498	0.0607271	0.769047
YPD	3	0	0	0	3	0.0949118	0.0752498	0.0607271	0.769047
LTD	3	0	0	3	0	0.0949118	0.0752498	0.694702	0.135072
IVD	3	1	2	0	0	0.306237	0.4979	0.0607271	0.135072
VVD	3	1	1	0	1	0.306237	0.286575	0.0607271	0.346397
VVE	3	1	0.5	0	1.5	0.306237	0.180912	0.0607271	0.452059
SNN	3	0	2.5	0	0.5	0.0949118	0.603562	0.0607271	0.240734
FVN	3	1.666	0	0.333	1	0.446979	0.0752498	0.131098	0.346397
VLS	3	0.833	0.833	0	1.333	0.270945	0.251283	0.0607271	0.416768
FNW	3	0.333	1	1	0.666	0.165283	0.286575	0.272052	0.275814
INW	3	0	1	0	2	0.0949118	0.286575	0.0607271	0.557722
VNW	3	0.5	1.5	0	1	0.200574	0.392237	0.0607271	0.346397
*ND	72	6.583	12.666	6.5	46.249	0.109129	0.179045	0.0982514	0.613532
*NN	34	4.329	16.744	4.496	8.409	0.146644	0.450473	0.137165	0.26514
*TD	32	3.333	3.333	22.166	3.166	0.127463	0.119393	0.613554	0.13951
*TN	31	22.833	1.666	3.833	2.666	0.663884	0.0768616	0.13008	0.129093
*SD	20	3.833	3.666	7.5	5	0.204013	0.187373	0.33679	0.271751
*SN	18	12.832	0.999	0.333	3.833	0.62637	0.084128	0.0466174	0.242716
*GD	14	0.75	0.25	9.5	3.5	0.0969597	0.0574486	0.570453	0.275102
*NS	13	0.833	6.998	0.5	4.666	0.106466	0.466064	0.0661342	0.361116
*NT	13	1	7.832	1.5	2.666	0.116523	0.516288	0.126355	0.240675
*VN	12	3.666	2	1.333	5	0.295152	0.175385	0.123365	0.405994
*GN	11	7	0.75	0	3.25	0.549013	0.100013	0.038435	0.312498
*NW	11	1.163	3.83	1.33	4.666	0.141305	0.315148	0.131334	0.411404
*VD	10	3.25	3	1.25	2.5	0.309216	0.277317	0.134829	0.278596
*MD	9	1	1	1.5	5.5	0.148159	0.13473	0.166477	0.550589
*PD	9	0	0.5	0.666	7.833	0.064826	0.0930632	0.0969774	0.745006
*LD	6	1	3.5	0	1.5	0.193522	0.473825	0.0480968	0.284505
*TS	6	2	1.5	1	1.5	0.311872	0.237125	0.166447	0.284505
*AD	5	0.583	0.25	3.5	0.666	0.160698	0.0980788	0.534957	0.206074
*VG	5	1	3	0	1	0.218326	0.478119	0.0512688	0.252231
*ID	4	0.333	0	0.833	2.833	0.141935	0.0685287	0.194136	0.595175
*VE	4	1	0.5	0	2.5	0.253101	0.151862	0.0553032	0.539675
*AN	4	1.166	1.166	0	1.666	0.280768	0.262862	0.0553032	0.400675
*IN	4	0.5	1.25	0	2.25	0.169768	0.276862	0.0553032	0.498008
*LS	4	0.833	1.833	0	1.333	0.225268	0.374029	0.0553032	0.345175
*GT	4	1	1	0	2	0.253101	0.235195	0.0553032	0.456341
*VT	4	1	0	0	3	0.253101	0.0685287	0.0553032	0.623008
*CD	3	1	0.33	1.33	0.33	0.306237	0.144987	0.341789	0.204809
*SE	3	2	0	0.25	0.75	0.517562	0.0752498	0.113558	0.293566
*AG	3	1.5	1	0.5	0	0.411899	0.286575	0.16639	0.135072
*LK	3	0	0	0	3	0.0949118	0.0752498	0.0607271	0.769047
*AS	3	1	0	0	2	0.306237	0.0752498	0.0607271	0.557722
*GS	3	2.25	0.75	0	0	0.570393	0.233743	0.0607271	0.135072
*SS	3	0	1	0.333	1.666	0.0949118	0.286575	0.131098	0.487139
*VS	3	1	1	0	1	0.306237	0.286575	0.0607271	0.346397
*TW	3	1.5	0	0.5	1	0.411899	0.0752498	0.16639	0.346397
*N*	147	14.908	50.32	14.326	67.406	0.113445	0.331895	0.102672	0.451723
*T*	86	40.665	6.499	28.165	10.665	0.452063	0.0882251	0.311771	0.14786
*S*	49	19.331	5.995	10.079	13.581	0.377609	0.132752	0.200721	0.288646
*V*	48	13.999	10	3.083	20.916	0.287566	0.207987	0.0770543	0.427334
*G*	35	11.5	3.916	9.5	10.083	0.318556	0.125434	0.256172	0.299789
*L*	23	4.333	7.333	0	11.333	0.200626	0.299288	0.0286257	0.471394
*A*	21	5.582	3.916	4	7.498	0.264644	0.189899	0.186076	0.359193
*P*	17	1	0.5	1.666	13.833	0.0979561	0.0638	0.111256	0.726907
*I*	15	1.833	4.75	1.333	7.083	0.150336	0.293872	0.104677	0.451027
*M*	10	1	1.333	1.5	6.166	0.138273	0.150667	0.153822	0.557119
*C*	6	4	0.33	1.33	0.33	0.548573	0.0986546	0.205503	0.146035
Background frequency		0.264776	0.207491	0.171724	0.358825	0.264776	0.207491	0.171724	0.358825
1 The PPR proteins displayed low assignment socres in the benchmark test (PpPPR_77, MEF3 and SLG1) were excluded to generate the scoring matrix.
2 The probability matrix is obtained from the nucleotide occurrence frequency with correction based on pseudo counts (see Material and Methods).
